# Supplementary material for: Current cancer driver variant predictors learn to recognize driver genes instead of functional variants
Source: PubMed Central journal article supplement (PMC7807764; doi:10.1186/s12915-020-00930-0), 2021-01-13
Supplement: 12915_2020_930_MOESM2_ESM.pdf [file 12915_2020_930_MOESM2_ESM.pdf]

## Supplementary Material

### Figures

Figure S1: Plots showing the distributions of the per-gene log-odds of containing driver vs passenger variants over the four datasets. We can see that DRGN has the most balanced distribution. The Wilcoxon ranksums p-value of the differences between the first three distributions and the DRGN are respectively  $6.7 \times 10^{-24}$ ,  $2.8 \times 10^{-19}$ ,  $9.0 \times 10^{-25}$  and the corresponding Cohen's  $d$  effect sizes are  $-1.3$ ,  $-1.4$ ,  $-0.9$  standard deviations.

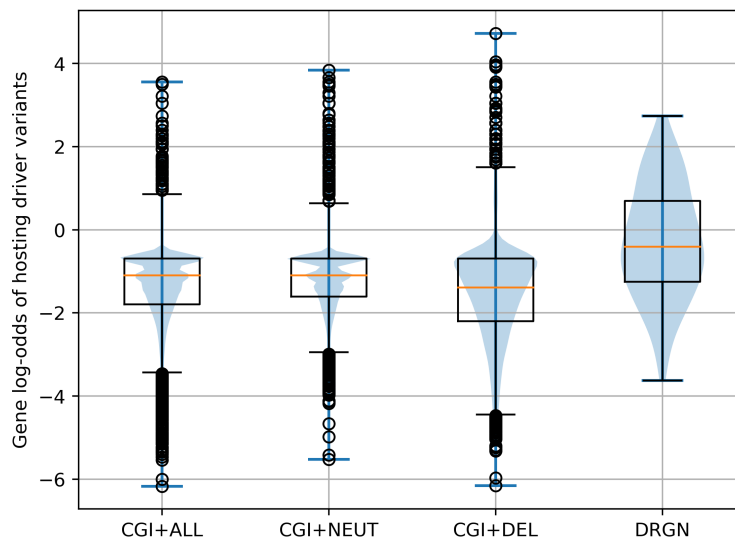

### Tables

Table S1: Table showing the percentages of the missing predictions for each cancer driver predictor on each dataset. All the predictors except FATHMM have a negligible number of missing predictions.

| Method    | EXPR+ALL | EXPR+DEL | EXPR+NEUT | DRGN |
|-----------|----------|----------|-----------|------|
| ParsSNP   | 0.0      | 0.0      | 0.0       | 0.0  |
| CanDrA v+ | 1.0      | 0.3      | 1.5       | 0.0  |
| Chasm 3.1 | 0.2      | 0.1      | 0.3       | 0.0  |
| CHASMplus | 0.6      | 0.2      | 0.9       | 0.0  |
| FATHMM    | 17.7     | 21.4     | 15.2      | 25.3 |
| TransFIC  | 1.4      | 0.4      | 2.2       | 0.0  |

## S1 Entropy computations

Entropy is computed as:

$$H(X) = - \sum_{i=1}^n p(X = x_i) \log_2 p(X = x_i)$$

The per-gene entropy for gene  $g$  is computed as:

$$H(X) = - \sum_{i \in g} p(X = x_i) \log_2 p(X = x_i)$$

The conditional entropy is computed as:

$$H(X|G) = - \sum_{j=1}^m \sum_{i=1}^n p(X = x_i, G = g_j) \log_2 \frac{p(G = g_j)}{p(X = x_i, G = g_j)}$$

where  $x_i$  is the class of variant  $i$  and  $g_j$  is the driver status of gene  $j$ .
